# Supplementary material
Source: PubMed Central journal article supplement (PMC3004023)
Supplement: NIHMS231958-supplement-1_si_001.pdf [file NIHMS231958-supplement-1_si_001.pdf]

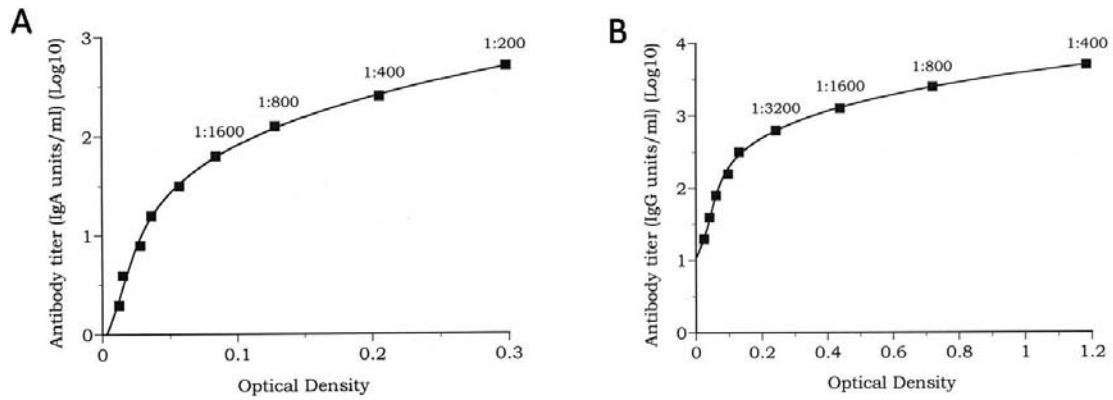

**Supplementary Figure 1.** Standard curve from ELISA measuring OVA-specific IgA (A) and OVA-specific IgG (B). The average background absorbance has been subtracted from the optical density readings. The dilution of the hyperimmune serum, which was serially diluted at a 1:2 dilution, is indicated next to each symbol.
